# Supplementary material for: Sex-Related Differences in Mortality, Delayed Cerebral Ischemia, and Functional Outcomes in Patients with Aneurysmal Subarachnoid Hemorrhage: A Systematic Review and Meta-Analysis
Source: MDPI journal article supplement (doi:10.3390/jcm13102781), 2024-05-09
Supplement: s1 [file s1]

## Supplementary Material

This supplementary material has been provided by the authors to give readers additional information about their work.

**Article title:** Sex-Related Differences in Mortality, Delayed Cerebral Ischemia, and Functional Outcomes in Patients with Aneurysmal Subarachnoid Hemorrhage: A Systematic Review and Meta-Analysis

**Journal name:** Journal of Clinical Medicine

**Author names:** Sarah Berli; Massimo Barbagallo; Emanuela Keller; Giuseppe Esposito; Alberto Pagnamenta; Giovanna Brandi

**Affiliation and e-mail address of the corresponding author:** Institute for Intensive Care Medicine, University Hospital Zurich, Switzerland, E-mail: giovanna.brandi@usz.ch

**Supplementary Table S1** Characteristics of the included studies for the mortality analysis

| Author         | Year | Total (n)     | Men (n)      | Women (n)     | Follow-up                     |
|----------------|------|---------------|--------------|---------------|-------------------------------|
| Badjatia       | 2021 | 489           | 210          | 279           | 60 days                       |
| Bögli          | 2023 | 338           | 123          | 215           | 3 months                      |
| Crago          | 2015 | 99            | 37           | 62            | 12 months                     |
| Darkwah Oppong | 2018 | 995           | 328          | 667           | In-hospital mortality         |
| De Marchis     | 2017 | 120           | 37           | 83            | In-hospital mortality         |
| Ding           | 2020 | 103           | 46           | 57            | 6 months                      |
| Festic         | 2013 | 318           | 114          | 204           | In-hospital mortality         |
| Fontana        | 2018 | 270           | 121          | 149           | In-hospital mortality         |
| Hamdan         | 2014 | 588           | 183          | 405           | 3 months                      |
| Kinter         | 2021 | 7271          | 2745         | 4526          | In-hospital mortality         |
| Lai            | 2019 | 294           | 67           | 227           | 6 months to 1 year            |
| Lee S          | 2015 | 2849          | 1179         | 1670          | In-hospital mortality         |
| Macleod        | 2002 | 1023          | 401          | 622           | In-and out-hospital mortality |
| Ramakrishna    | 2008 | 46            | 12           | 34            | 1 month                       |
| Rehmann        | 2020 | 577           | 179          | 398           | In-hospital mortality         |
| Schertz        | 2016 | 121           | 35           | 86            | 30 days                       |
| Stegmayr       | 2004 | 984           | 392          | 592           | 28 days                       |
| Tujjar         | 2017 | 202           | 78           | 124           | ICU mortality                 |
| Virta          | 2022 | 1847          | 780          | 1067          | 12-months                     |
| <b>Total</b>   |      | <b>18'534</b> | <b>7'067</b> | <b>11'467</b> |                               |

**Supplementary Table S2** Characteristics of the included studies for the delayed cerebral ischemia analysis

| Author               | Year | Total (n) | Men (n) | Women (n) |
|----------------------|------|-----------|---------|-----------|
| Abulhasan            | 2020 | 322       | 106     | 216       |
| Badjatia             | 2012 | 50        | 17      | 33        |
| Bakker               | 2007 | 321       | 90      | 231       |
| Barletta             | 2013 | 42        | 21      | 21        |
| Bjerkne<br>Wenneberg | 2020 | 55        | 15      | 40        |
| Bögli                | 2023 | 343       | 125     | 218       |
| Carrera              | 2009 | 441       | 123     | 318       |
| Chen                 | 2021 | 333       | 128     | 205       |
| Crago                | 2015 | 99        | 37      | 62        |
| Crobeddu             | 2012 | 292       | 99      | 193       |
| Da Silva             | 2017 | 55        | 15      | 40        |
| Darkwah<br>Oppong    | 2018 | 935       | 329     | 606       |
| De Marchis           | 2017 | 120       | 37      | 83        |
| Duan                 | 2018 | 504       | 209     | 295       |
| Fan                  | 2021 | 52        | 22      | 30        |
| Fang                 | 2019 | 702       | 264     | 438       |
| Fischer              | 2019 | 30        | 9       | 21        |
| Fontana              | 2018 | 270       | 121     | 149       |
| Fukuda               | 2019 | 197       | 69      | 128       |
| Germans              | 2018 | 6712      | 2306    | 4406      |
| Guan                 | 2016 | 24        | 9       | 15        |
| Hamdan               | 2014 | 617       | 191     | 426       |
| Heit                 | 2018 | 16        | 5       | 11        |
| Hirashima            | 2005 | 145       | 44      | 101       |
| Hu                   | 2022 | 109       | 36      | 73        |
| Kasius               | 2010 | 91        | 24      | 67        |
| Kaur                 | 2021 | 149       | 41      | 108       |
| Kawabata             | 2011 | 102       | 40      | 62        |
| Ko                   | 2011 | 160       | 58      | 102       |
| Kozak                | 2016 | 434       | 176     | 258       |
| Lai                  | 2019 | 328       | 75      | 253       |
| Lee H                | 2018 | 463       | 138     | 325       |
| Megjhani             | 2021 | 388       | 115     | 273       |
| Naraoka              | 2022 | 128       | 48      | 80        |
| Neidert              | 2018 | 1321      | 468     | 853       |
| Nguyen               | 2021 | 54        | 13      | 41        |
| Oliveira Souza       | 2023 | 206       | 60      | 146       |
| Park                 | 2019 | 488       | 156     | 332       |
| Platz                | 2017 | 504       | 168     | 336       |
| Qureshi              | 2000 | 283       | 76      | 207       |
| Raatikainen          | 2021 | 340       | 134     | 206       |
| Rautalin             | 2022 | 1916      | 684     | 1232      |
| Rehman               | 2020 | 544       | 169     | 375       |
| Ritzenthaler         | 2021 | 349       | 122     | 227       |
| Rowland              | 2017 | 22        | 8       | 14        |

|               |      |               |              |               |
|---------------|------|---------------|--------------|---------------|
| Sanelli       | 2013 | 96            | 25           | 71            |
| Saripalli     | 2021 | 175           | 51           | 124           |
| Schembri      | 2021 | 90            | 27           | 63            |
| Sorrentino    | 2023 | 119           | 30           | 89            |
| Van der Steen | 2019 | 369           | 117          | 252           |
| Van Os        | 2020 | 582           | 167          | 415           |
| Wu            | 2019 | 122           | 48           | 74            |
| Yao           | 2017 | 237           | 110          | 127           |
| Young         | 2016 | 579           | 216          | 363           |
| Zhang         | 2021 | 439           | 135          | 304           |
| <b>Total</b>  |      | <b>23'864</b> | <b>8'126</b> | <b>15'738</b> |

**Supplementary Table S3** Characteristics of the included studies for the functional outcome analysis

| Author         | Year | Total (n)    | Men (n)      | Women (n)    | Follow-up          | Outcome |
|----------------|------|--------------|--------------|--------------|--------------------|---------|
| Bretz          | 2017 | 72           | 25           | 47           | 6 months           | mRS     |
| Crago          | 2015 | 65           | 23           | 42           | 3 months           | mRS     |
| Darkwah Oppong | 2018 | 752          | 243          | 509          | 6 months           | mRS     |
| De Marchis     | 2017 | 120          | 37           | 83           | 6 months           | mRS     |
| Ding           | 2020 | 103          | 46           | 57           | 6 months           | mRS     |
| Güresir        | 2020 | 231          | 84           | 147          | 6 months           | mRS     |
| Hamdan         | 2014 | 588          | 183          | 405          | 3 months           | mRS     |
| Lai            | 2019 | 294          | 67           | 227          | 6 months to 1 year | mRS     |
| Ois            | 2019 | 401          | 156          | 245          | 3 months           | mRS     |
| Unda           | 2020 | 177          | 52           | 125          | 12-18 months       | mRS     |
| Young          | 2016 | 579          | 216          | 363          | 3 months           | mRS     |
| Achrén         | 2022 | 108          | 53           | 55           | 3 months           | GOS     |
| Fontana        | 2018 | 270          | 121          | 149          | 3 months           | GOS     |
| Galea          | 2017 | 3341         | 1152         | 2189         | hospital discharge | GOS     |
| Pereira        | 2007 | 51           | 20           | 31           | 1 year             | GOS     |
| Qi             | 2021 | 49           | 15           | 34           | 30 days            | GOS     |
| Tujjar         | 2017 | 202          | 78           | 124          | 28 days            | GOS     |
| Bögli          | 2023 | 338          | 123          | 215          | 3 months           | GOSE    |
| <b>Total</b>   |      | <b>7'739</b> | <b>2'694</b> | <b>5'045</b> |                    |         |
